# Supplementary material
Source: Springer Nature journal article supplement (https://www.springermedizin.de/resource/supplementary/12913_2006_382_MOESM4_ESM.pdf/9535064)
Supplement: MOESM4 [file 9535064]

Table 3. Two-part models of general practitioner, specialist, and hospital services (continued)

| Variable                          | General practitioners |                                     | Specialists |                                     | Hospitals |                                     |
|-----------------------------------|-----------------------|-------------------------------------|-------------|-------------------------------------|-----------|-------------------------------------|
|                                   | Logistic              | Zero-truncated<br>negative binomial | Logistic    | Zero-truncated<br>negative binomial | Logistic  | Zero-truncated<br>negative binomial |
|                                   | OR                    | IRR                                 | OR          | IRR                                 | OR        | IRR                                 |
| Health Utilities Index            | 0.95                  | 0.93 ***                            | 0.91 **     | 0.91 *                              | 1.04      | 0.99                                |
| Self-perceived health             | ***                   | ***                                 | ***         | ***                                 | ***       | ***                                 |
| Excellent                         | 1.00                  | 1.00                                | 1.00        | 1.00                                | 1.00      | 1.00                                |
| Very good                         | 1.21 ***              | 1.21 ***                            | 1.17 ***    | 1.19 ***                            | 1.00      | 1.10                                |
| Good                              | 1.25 ***              | 1.53 ***                            | 1.38 ***    | 1.44 ***                            | 1.39 ***  | 1.36 ***                            |
| Fair or poor                      | 1.51 ***              | 2.00 ***                            | 1.81 ***    | 1.87 ***                            | 1.99 ***  | 1.80 ***                            |
| Missing                           | 0.82                  | 1.54 *                              | 0.62        | 0.99                                | 4.11 *    | 1.36                                |
| Stress                            | ***                   | ***                                 |             |                                     |           | ***                                 |
| Not at all or not very stressed   | 1.00                  | 1.00                                | 1.00        | 1.00                                | 1.00      | 1.00                                |
| A bit stressed                    | 1.07 *                | 1.03                                | 1.02        | 1.00                                | 0.90 **   | 0.92                                |
| Quite a bit or extremely stressed | 1.16 ***              | 1.10 ***                            | 1.05        | 1.06                                | 0.94      | 0.92 ***                            |
| Missing                           | 1.31                  | 0.99                                | 0.93        | 1.34                                | 0.76      | 1.45 *                              |
| Depression                        | ***                   | ***                                 | ***         | ***                                 | ***       | ***                                 |
| 0                                 | 1.00                  | 1.00                                | 1.00        | 1.00                                | 1.00      | 1.00                                |
| 1                                 | 0.96                  | 1.17 **                             | 1.10        | 1.05                                | 1.19      | 0.93                                |
| 2                                 | 1.33 ***              | 1.30 ***                            | 1.31 ***    | 1.44 ***                            | 1.34 ***  | 1.32 ***                            |
| 3                                 | 1.92 ***              | 1.47 ***                            | 1.56 ***    | 1.74 ***                            | 1.73 ***  | 1.34 **                             |
| 4                                 | 1.91 ***              | 1.78 ***                            | 1.61 ***    | 2.03 ***                            | 2.67 ***  | 1.98 ***                            |
| Missing                           | 0.90                  | 1.19 ***                            | 1.13        | 1.39 ***                            | 1.43 **   | 1.03                                |
| ADL                               | **                    | ***                                 | ***         | ***                                 | ***       | *                                   |
| No limitation                     | 1.00                  | 1.00                                | 1.00        | 1.00                                | 1.00      | 1.00                                |
| Sometimes                         | 0.98                  | 1.08 ***                            | 1.11 **     | 1.13 **                             | 0.94      | 0.93                                |
| Often                             | 1.19 **               | 1.17 ***                            | 1.35 ***    | 1.20 ***                            | 1.19 **   | 1.07                                |
| IADL                              | ***                   | ***                                 | ***         | ***                                 | ***       | ***                                 |
| No                                | 1.00                  | 1.00                                | 1.00        | 1.00                                | 1.00      | 1.00                                |
| Yes                               | 1.36 ***              | 1.35 ***                            | 1.41 ***    | 1.40 ***                            | 1.83 ***  | 1.50 **                             |
| Missing                           | 1.76                  | 1.09                                | 1.42        | 1.35                                | 1.52      | 1.22                                |
| Birth <sup>^</sup>                | 1.06                  | 1.53 ***                            | 1.24 ***    | 2.11 ***                            | 5.26 ***  | 1.03                                |
| Injury <sup>^</sup>               | 2.30 ***              | 1.29 ***                            | 1.43 ***    | 1.11 **                             | 1.75 ***  | 1.09                                |
| Injury x age <sup>^^</sup>        | **                    | ***                                 |             |                                     |           |                                     |
| Number of chronic conditions      | ***                   | ***                                 | ***         | **                                  | **        | *                                   |
| 0                                 | 1.00                  | 1.00                                | 1.00        | 1.00 **                             | 1.00      | 1.00                                |
| 1                                 | 1.52 ***              | 1.32 ***                            | 1.67 ***    | 1.17 **                             | 1.41 ***  | 1.20 **                             |
| 2                                 | 2.05 ***              | 1.57 ***                            | 2.29 ***    | 1.20 **                             | 1.48 ***  | 1.27 **                             |
| 3                                 | 2.44 ***              | 1.73 ***                            | 2.67 ***    | 1.26 ***                            | 1.56 ***  | 1.33 **                             |
| 4+                                | 2.72 ***              | 1.83 ***                            | 3.47 ***    | 1.48 ***                            | 1.50 ***  | 1.31 **                             |
| Missing                           | 1.04                  | 1.74 ***                            | 2.16 ***    | 1.20                                | 1.41 *    | 1.32                                |
